# Supplementary material for: Direct observation of local xylem embolisms induced by soil drying in intact Zea mays leaves
Source: PubMed Central journal article supplement (PMC4861012; doi:10.1093/jxb/erw087), 2016-03-05

## Direct observation of local xylem embolisms induced by soil drying in intact maize leaves

Jeongeun Ryu, Bae Geun Hwang, Yangmin X Kim, and Sang Joon Lee Supplementary Information

Figure S1. Discrimination of air-filled and water-filled xylem vessels based on gray values

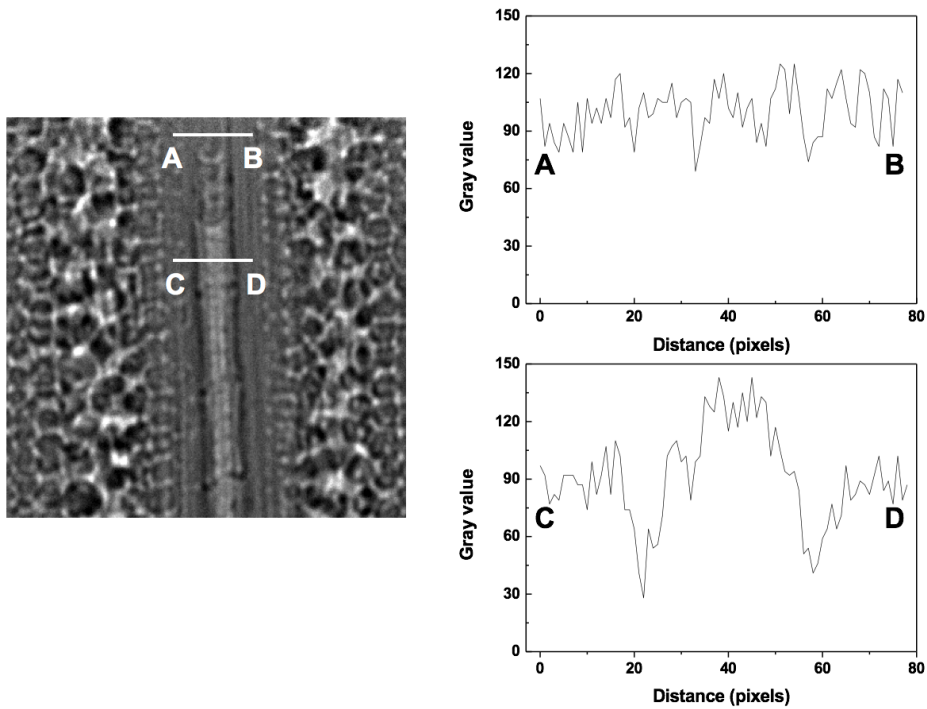

Supplement: supp_erw087_Supplementary_Figure_1.pdf [file supp_erw087_Supplementary_Figure_1.pdf]
